1 Antenna modification leads to enhanced nitrogenase activity in a high light  
2 tolerant cyanobacterium

3  
4 Anindita Bandyopadhyay<sup>1,a</sup>, Zi Ye<sup>1,2,a</sup>, Zuzana Benedikty<sup>3</sup>, Martin Trtilek<sup>3</sup>, Himadri B.  
5 Pakrasi<sup>1,b</sup>

6 <sup>1</sup>Department of Biology, Washington University, St. Louis MO 63130, USA

7 <sup>2</sup>Current address: State Key Laboratory of Freshwater Ecology and Biotechnology,  
8 Institute of Hydrobiology, Chinese Academy of Sciences, Wuhan 430072, China

9 <sup>3</sup>Photon Systems Instruments, spol. s r.o., Drasov 470, 664 24 Drasov, Czech Republic

10 a. A.B. and Z.Y. have contributed equally to this work.

11 b. To Whom correspondence may be addressed. Email: pakrasi@wustl.edu.

12

13 **Abstract**

14 Biological nitrogen fixation is an energy intensive process that contributes significantly  
15 towards supporting life on this planet. Among nitrogen-fixing organisms, cyanobacteria  
16 remain unrivaled in their ability to fuel the energetically expensive nitrogenase reaction  
17 with photosynthetically harnessed solar energy. In heterocystous cyanobacteria light-  
18 driven, photosystem I (PSI)-mediated ATP synthesis plays a key role in propelling the  
19 nitrogenase reaction. Efficient light transfer to the photosystems rely on phycobilisomes  
20 (PBS), the major antenna protein complexes. PBS undergo degradation as a natural  
21 response to nitrogen starvation. Upon nitrogen availability, these proteins are  
22 resynthesized back to normal levels in vegetative cells, but their occurrence and  
23 function in heterocysts remains inconclusive. *Anabaena* 33047 is a heterocystous

24 cyanobacterium that thrives under high light, harbors higher amounts of PBS in its  
25 heterocysts and fixes nitrogen at higher rates compared to other heterocystous  
26 cyanobacteria. To assess the relationship between PBS in heterocysts and nitrogenase  
27 function, we engineered a strain that retains high amounts of the antenna proteins in its  
28 heterocysts. Intriguingly, under high light intensities the engineered strain exhibited  
29 unusually high rates of nitrogenase activity compared to the wild type. Spectroscopic  
30 analysis revealed altered PSI kinetics in the mutant, with increased cyclic electron flow  
31 around PSI, a route that contributes to ATP generation and nitrogenase activity in  
32 heterocysts. Retaining higher levels of PBS in heterocysts appears to be an effective  
33 strategy to enhance nitrogenase function in cyanobacteria that are equipped with the  
34 machinery to operate under high light intensities.

### 35 **Importance**

36 The function of phycobilisomes, the large antenna protein complexes in heterocysts has  
37 long been debated. This study provides direct evidence of the involvement of these  
38 proteins in supporting nitrogenase activity in *Anabaena* 33047, a heterocystous  
39 cyanobacterium that has affinity for very high light intensities. This strain was previously  
40 known to be recalcitrant to genetic manipulation and hence despite its many appealing  
41 traits, remained largely unexplored. We developed a genetic modification system for this  
42 strain and generated a  $\Delta nblA$  mutant that exhibited resistance to phycobilisome  
43 degradation upon nitrogen starvation. Physiological characterization of the strain  
44 indicated that PBS degradation is not essential for acclimation to nitrogen deficiency  
45 and retention of PBS is advantageous for nitrogenase function.

46

## 47 **Introduction**

48 Nitrogen fixation is a crucial process by which molecular nitrogen is rendered accessible  
49 to all life forms. The process is energy intensive, making fixed nitrogen a sparse  
50 commodity in many natural habitats and cultivated lands. Of the nitrogen fixing  
51 organisms, photosynthetic prokaryotes with the inherent ability to couple the energy  
52 demanding nitrogenase reaction with energy generating photosynthesis have a distinct  
53 advantage. Cyanobacteria constitute a group of oxygenic photosynthetic prokaryotes,  
54 some members of which have the dual ability to fix carbon and nitrogen. Nitrogenase,  
55 the enzyme catalyzing microbial nitrogen fixation is prone to destruction by oxygen and  
56 as such, diazotrophic cyanobacterial species have evolved to separate the incompatible  
57 processes of photosynthesis and nitrogen fixation temporally or spatially.

58         Some filamentous cyanobacteria segregate nitrogen fixation in specialized cells  
59 called heterocysts. Heterocysts lack functional photosystem II (PSII) and oxygenic  
60 photosynthesis but have a fully functional photosystem I (PSI) that is involved in  
61 generating ATP by cyclic photophosphorylation (1). Studies have indicated that the  
62 main source of ATP for nitrogen fixation in heterocysts is the light reactions in the  
63 thylakoids and that the required ATP can be provided entirely by light driven cyclic  
64 photophosphorylation (2-4). Compared to adjoining vegetative cells, heterocysts have a  
65 significantly higher abundance of PSI protein subunits (5, 6) as well as subunits of the  
66 Cyt- $b_6f$  complex involved in cyclic electron transport (3, 7). In addition, the number of  
67 photosynthetic units (ratio of chlorophyll a/P700) per heterocyst is 50% higher  
68 compared to vegetative cells (2)7, (8). All these evidences point to a distinct role for light  
69 and PSI in heterocyst function.

70 Light harvest in cyanobacteria is achieved by large protein complexes called  
71 phycobilisomes (PBS) that transfer energy to PSI and PSII reaction centers(9). PBS  
72 undergo degradation as an adaptive strategy to various environmental stress conditions  
73 like high light and nitrogen deficiency (10, 11). Although the mechanism of PBS  
74 degradation is yet to be fully elucidated, it has been established that NblA, a small  
75 protein consisting of 60 amino acids is a key player in the process (12). The effect of  
76 *nblA* deletion has been extensively investigated in non-diazotrophic model strains of  
77 cyanobacteria in which PBS degradation is an essential adaptive mechanism to survive  
78 high light and nitrogen stress (13-15). In contrast, PBS degradation is less likely to have  
79 a role in acclimation to these stress factors in high light tolerant, diazotrophic  
80 cyanobacteria and the effect of *nblA* deletion in these strains is yet to be investigated.

81 *Anabaena* sp. ATCC 33047 is a fast growing filamentous cyanobacteria that has  
82 garnered interest for its ability to thrive under very high light intensities and fix carbon  
83 and nitrogen at high rates (16). This strain was shown to harbor significant amounts of  
84 PBS in its heterocysts, implying expensive re-synthesis of these antenna protein  
85 complexes after the initial nitrogen acclimation phase. However, the function of these  
86 proteins in mature heterocysts and its relation to nitrogen fixation was not obvious (17).  
87 Earlier studies implicating a role for PBS in nitrogen fixation, specifically in energy  
88 transfer to PSI (7, 18, 19), led us to develop a genome engineering strategy for this  
89 previously recalcitrant strain and generate a  $\Delta nblA$  mutant that would enable us to  
90 investigate the effect of heterocyst antenna modification on nitrogenase function. The  
91  $\Delta nblA$  mutant retained high amounts of PBS in its heterocysts and

92 exhibited 2-3-fold higher nitrogenase activity compared to the WT. Spectroscopic  
93 analysis of the mutant indicated higher cyclic electron flow, possibly resulting from  
94 higher energy transfer to PSI, facilitated by excess PBS in heterocysts. This in turn  
95 leads to higher ATP generation and enhanced nitrogenase activity. Our study suggests  
96 that augmenting light capture by heterocysts of high light tolerant cyanobacteria can be  
97 an effective strategy to enhance nitrogen fixation.

## 98 **Results**

### 99 ***Anabaena* 33047 thrives under very high light intensities.**

100 *Anabaena* 33047 exhibited rapid growth both in the presence and absence of added  
101 nitrogen sources and an increase in growth rate was observed with increasing light  
102 intensity (Fig. 1 A, B). When grown at 42°C in media supplemented with nitrogen  
103 sources and 1% CO<sub>2</sub>, the fastest growth rate (doubling time of 3.18±.16 h) was  
104 observed under 1500 - 2000 μmol photons m<sup>-2</sup>s<sup>-1</sup> of light (Fig. 1A). At higher light  
105 intensities (up to 3000 μmol photons m<sup>-2</sup>s<sup>-1</sup>), although no increase in growth rate was  
106 observed, higher biomass accumulation could be achieved. When grown under light  
107 intensities of 3000 μmol photons m<sup>-2</sup>s<sup>-1</sup> high amounts of exopolysaccharide (EPS) was  
108 secreted into the media which led to excessive clumping of filaments (data not shown).  
109 When grown under 2000 μmol photons m<sup>-2</sup>s<sup>-1</sup> of light in nitrogen-deplete media, a  
110 doubling time of 3.8±0.43 h was observed (Fig. 1B). These growth rates are  
111 considerably higher compared to the commonly studied model filamentous strain  
112 *Anabaena* 7120, which under 400 μmol photons m<sup>-2</sup>s<sup>-1</sup> light at 28°C exhibits a doubling  
113 time of 8.5±0.32 h under N<sub>2</sub>-sufficient and 12.2±0.86 h under N<sub>2</sub>-deficient conditions  
114 (Fig S2). Under light intensities >1500 μmol photons m<sup>-2</sup>s<sup>-1</sup> light this strain exhibits

115 growth inhibition (data not shown). In contrast, growth of *Anabaena* 33047 is greatly  
116 inhibited under light intensities  $<500 \mu\text{mol photons m}^{-2}\text{s}^{-1}$  light.

117 Light microscopic analysis of filaments grown under nitrogen-fixing conditions  
118 revealed higher frequency (14%) of heterocysts in *Anabaena* 33047 as compared to  
119 *Anabaena* 7120 (10%) (Fig. S1A) and about 50% higher specific activity of the  
120 nitrogenase enzyme when cells were grown under conditions optimal (see methods  
121 section) for *Anabaena* 7120 (Fig. S1B).

### 122 **Engineering *Anabaena* 33047 for genetic amenability**

123 As anticipated, the *Anabaena* 33047 strain procured from the UTEX culture collection  
124 proved to be intractable to all targeted genetic modification attempts. Studies have  
125 documented successful transformation of filamentous cyanobacteria by modification of  
126 the host restriction modification (RM) system (20). None of the existing conjugal, helper  
127 and suicide cargo plasmids (21) yielded any success with conjugation of *Anabaena*  
128 33047. We mined the genome sequence of this strain to ascertain its RM system and  
129 subsequently modify it to our advantage. We identified several methylase or  
130 methyltransferase genes that appeared to be associated with a type II restriction system  
131 (adjacent genes encoded for restriction enzymes). These genes together with their  
132 upstream regions were cloned into a helper plasmid (based on helper plasmid pRL623)  
133 in various combinations and tested for conjugation efficiency. Various conjugation  
134 experiments revealed that a helper plasmid with five genes (see method section for  
135 details) in tandem, driven by a lac promoter was most effective in conjugating *Anabaena*  
136 33047 (Fig. S3 A). Using the newly synthesized plasmid, we performed targeted gene  
137 deletions and successfully generated a  $\Delta nbIA$  mutant of this strain. Surprisingly, unlike

138 other filamentous cyanobacterial strains where single homologous recombination is  
139 known to be prevalent in the first few generations, almost all the colonies tested in  
140 *Anabaena* 33047 for the gene deletions were double recombinants in the first  
141 generation (Fig. S3 B). The complete segregation of the mutant was verified by PCR  
142 analysis (Fig. S3 C).

### 143 **The $\Delta nbIA$ mutant retains high amounts of PBSs in heterocysts**

144 Fluorescence microscopic analysis revealed that under nitrogen-deficient growth  
145 conditions, PBS returned to their normal levels in the vegetative cells of the WT within  
146 24h of onset of nitrogen starvation. However, PBS content of the heterocysts remained  
147 significantly lower. In contrast, the  $\Delta nbIA$  strain exhibited high amounts of PBS both in  
148 the vegetative cells and the heterocysts as the filaments acclimatized to nitrogen  
149 deficiency and both cell types appeared brightly fluorescent (Fig. 2 A-D). We quantitated  
150 the PBS content in the mutant and WT heterocysts with the help of a fluorescence  
151 kinetic microscope (FKM) (Fig. 2 E,F). Steady state fluorescence, depicting the amount  
152 of phycobiliproteins in the heterocysts was about eight-fold higher in the  $\Delta nbIA$  mutant  
153 compared to the WT (Fig. 2G). In contrast, the PBS levels in the vegetative cells of a  
154 nitrogen fixing filament was not significantly different between the WT and the mutant  
155 strains (data not shown).

156 To evaluate the effect of averting PBS degradation on the physiology of this fast  
157 growing, high light tolerant cyanobacterium, we compared the growth rate of the WT  
158 and the  $\Delta nbIA$  mutant under different light intensities. Differences in growth rate was  
159 observed between the mutant and the WT under low light intensities. When grown  
160 under  $250 \mu\text{mol photons m}^{-2}\text{s}^{-1}$ , the mutant exhibited ~50% higher growth rate compared

161 to the WT (Fig. S4). The difference in growth rate narrowed with increasing light  
162 intensities and at 500  $\mu\text{mol photons m}^{-2}\text{s}^{-1}$  the mutant grew ~ 12% faster than the WT  
163 (Fig. S4). The mutant and the WT exhibited comparable growth rates up to 1500  $\mu\text{mol}$   
164  $\text{photons m}^{-2}\text{s}^{-1}$ . Under higher light intensities ( $\geq 2000 \mu\text{mol photons m}^{-2}\text{s}^{-1}$ ), the mutant  
165 initially grew at a slightly reduced rate compared to the WT although final biomass  
166 accumulation was similar in both the strains (Fig. S4). The faster growth rate under low  
167 light correlated with increased quantum yield and enhanced oxygen evolution rates in  
168 the mutant (data not shown) which indicated higher photosynthetic activity. In contrast,  
169 photosynthetic activity under high light was slightly reduced.

#### 170 **The $\Delta nblA$ mutant exhibits unusually high rates of nitrogenase activity**

171 To assess the effect of PBS retention on heterocyst function in the high light tolerant  
172 *Anabaena* 33047, we compared nitrogenase activity in the WT and  $\Delta nblA$  strains. When  
173 grown under 250  $\mu\text{mol photons m}^{-2}\text{s}^{-1}$  light, no significant difference in nitrogenase  
174 activity was observed between the mutant and the WT (Fig. 3). However, when grown  
175 under 2000  $\mu\text{mol photons m}^{-2}\text{s}^{-1}$  light, the mutant exhibited 2 to 3-fold higher specific  
176 rates of nitrogenase activity compared to the WT (Fig. 3). If grown for more than 36 h  
177 under high light in nitrogen deplete medium, both the mutant and the WT filaments  
178 clumped into a ball due to excess EPS secretion and both strains exhibited greatly  
179 reduced rates of nitrogenase activity. When incubated in the dark, rates of nitrogenase  
180 activity were drastically reduced for both the mutant and the WT grown under low or  
181 high light intensities (data not shown) indicating that the activity is light dependent.  
182 When treated with DBMIB (2,5-dibromo-3-methyl-6-isopropyl benzoquinone), a quinone  
183 analogue that inhibits the cytochrome  $b_6f$  complex and thus disables cyclic electron



184 flow(22), nitrogen fixation rates were drastically reduced both in the mutant and the WT.  
185 On the other hand, incubation with DCMU (3-(3,4-dichlorophenyl)-1,1-dimethylurea),  
186 which blocks PSII and linear electron transport alone, did not have any inhibitory effect  
187 on nitrogenase activity in the WT or the mutant (Fig S5).

### 188 **P700 oxidation kinetics suggest higher cyclic electron flow in the mutant**

189 To investigate the basis of the enhanced nitrogenase activity in the  $\Delta nbIA$  mutant grown  
190 under high light and to assess if the mutant exhibited any difference in PSI function, we  
191 probed the oxidation/reduction kinetics of PSI reaction centers in both the mutant and  
192 the WT using a Joliot type JTS-10 spectrophotometer (23, 24). We exposed dark-  
193 adapted WT and  $\Delta nbIA$  cells grown under high light to a 5 second pulse of actinic light  
194 and measured the oxidation of P700. This was followed by measurement of the re-  
195 reduction kinetics in the dark. These measurements were carried out in the absence  
196 and presence of the inhibitor DCMU (Fig. S6A, Fig 4), which blocks PSII and linear  
197 electron flow in the vegetative cells, thus allowing only cyclic electron flow (CEF) around  
198 PSI in the vegetative cells and heterocysts. We also assessed samples treated with  
199 DCMU and DBMIB, inhibiting both linear and cyclic electron flows.

200 When linear electron flow was blocked with DCMU, the P700 oxidation kinetics between  
201 the WT and the mutant filaments grown under nitrogen fixing conditions were strikingly  
202 different, with greater oxidation of P700 achieved in the  $\Delta nbIA$  mutant compared to the  
203 WT (Fig. 4 A). In contrast, when treated with DCMU and DBMIB, the oxidation of P700  
204 between the two strains was similar (Fig. 4B). This indicated that the difference  
205 observed with DCMU treatment could be a result of enhanced flow of electrons to PSI in  
206 the mutant via the cyclic pathway which is obstructed by DBMIB treatment and is not a

207 true reflection of the amount of P700 in the cells . To enable comparison between the  
208 mutant and the WT, we normalized the kinetics of P700<sup>+</sup> re-reduction in the dark (Fig.  
209 4C) to the maximal oxidation observed (24). The  $\Delta nblA$  mutant exhibited faster re-  
210 reduction kinetics in the presence of DCMU compared to the WT (Fig. 4C). In contrast,  
211 the re-reduction kinetics appeared to be similar in the two strains when treated with  
212 DCMU and DBMIB (Fig. S6B). Based on the assumption that CEF is the main  
213 contributor to P700<sup>+</sup> re-reduction, we calculated the percentage contribution of cyclic vs  
214 linear electron transport to P700<sup>+</sup> re-reduction in the WT and mutant filaments (Fig. 4D)  
215 (24, 25). When cells grown under high light were treated with DCMU, the mutant  
216 showed greater reliance on CEF for P700 oxidation compared to the WT. Under these  
217 conditions, the cyclic process accounted for ~24% electron flow to P700<sup>+</sup> in the mutant  
218 (Fig. 4D). To assess the contribution of vegetative cells to the observed difference in  
219 P700 oxidation between the mutant and the WT, we measured P700 oxidation in  
220 filaments grown under nitrogen sufficient conditions (filaments without any heterocysts).  
221 No significant difference in P700 oxidation was observed between the vegetative cells  
222 of the WT and the mutant treated with DCMU (Fig S6C).

## 223 **Discussion**

224 *Anabaena* 33047 is unique among heterocystous cyanobacteria in its ability to  
225 thrive under very high light intensities. The strain also fixes nitrogen at higher rates  
226 (Fig. S1 B) and harbors higher amount of PBS in its heterocysts compared to other  
227 heterocystous cyanobacteria (17). This study was initiated to investigate the role of and  
228 relationship between high light and PBS content in the heterocysts of *Anabaena* 33047.  
229 To this end, we successfully engineered a strategy to modify the genome of this

230 previously recalcitrant strain and generated a *nbIA* deletion mutant which retained high  
231 amounts of PBS in its heterocysts and enabled us to assess the function of these  
232 antenna pigment proteins in nitrogen fixation.

233 Our current understanding of the effects of averting PBS degradation in  
234 cyanobacteria by deleting *nbIA* relies largely on studies in non-diazotrophic strains (12,  
235 13, 26-28). The only diazotrophic strain where a  $\Delta nbIA$  mutant has been characterized  
236 so far is *Anabaena* 7120 and under the conditions tested, the deletion did not have any  
237 impact on growth or nitrogen fixation (29). This indicated that degradation of PBS is not  
238 an essential adaptive strategy for heterocystous strains to transition from a nitrogen-  
239 deplete to a nitrogen-fixing condition.

240 Various studies have revealed the functional association between PBS and PSI  
241 in heterocysts. A study in *Anabaena variabilis* demonstrated a role for PBS in efficient  
242 transfer of light energy to PSI and photo-oxidation of P-700, the reaction center of PSI  
243 (30). A similar study in *Anabaena* 7120 reported the isolation of a PBS-PSI super  
244 complex, the spectral analysis of which revealed efficient energy transfer from PBS to  
245 PSI(19). A previously unknown linker component *cpcL* was shown to be involved in  
246 establishing the connection between PBS and PSI. Interestingly, this linker is found in  
247 many heterocystous cyanobacteria, including *Anabaena* 33047, but not in unicellular  
248 cyanobacteria that fix nitrogen at night. The study found that the levels of this linker  
249 were four-fold higher in heterocysts compared to vegetative cells and proposed a role  
250 for the PBS-*cpcL*-PSI complex in harvesting light energy and facilitating PSI driven  
251 nitrogen fixation. These findings were also supported by a more recent study which  
252 showed transfer of energy from *cpcL*-PBS to PSI in a mutant of *Anabaena* 7120 (4). In

253 addition, a role for these phycobiliproteins in supporting light-driven nitrogenase activity  
254 in heterocysts was also demonstrated (30).

255 In heterocystous cyanobacteria cyclic electron flow around PSI plays a crucial  
256 role in driving nitrogenase activity (31-33). Cyclic electron flow relies on the transfer of  
257 reducing equivalents from PSI to the plastoquinone pool via the NDH-1 complex. The  
258 reduced plastoquinone pool is re-oxidized by the cytochrome-b6/f (Cyt-b6/f) complex  
259 which transfers electrons back to PSI via plastocyanin, thereby completing the cycle.  
260 This cyclic flow of electrons is coupled to the generation of a proton gradient across the  
261 thylakoid membrane which drives ATP synthesis (Fig. 5). CEF around PSI is light  
262 dependent and it has been demonstrated that CEF can vary with light intensity, with  
263 increased irradiance leading to higher rates of CEF (34, 35).

264 The  $\Delta nblA$  mutant exhibited higher PBS content in its heterocysts and higher  
265 nitrogenase activity. Spectroscopic studies demonstrated higher CEF in the mutant  
266 compared to the WT (Figs. 2, 3, 4). Our FKM analysis did not reveal any significant  
267 difference in pigment content between the vegetative cells of the mutant and the WT  
268 (after PBS is resynthesized in the WT) and no significant difference was observed in  
269 P700 oxidation between the vegetative cells of the mutant and the WT grown under  
270 nitrogen sufficient conditions. These observations suggest that the enhanced CEF  
271 detected in the mutant is likely a reflection of the altered photochemistry in its  
272 heterocysts brought about by higher levels of PBS which in turn contributes to  
273 enhanced nitrogenase activity. In addition, averting PBS degradation can eliminate the  
274 need for the expensive re-synthesis of these large antenna complexes, a phenomenon  
275 that likely takes place in the wild type *Anabaena* 33047 heterocysts that harbor higher

276 amounts of PBS compared to other cyanobacteria. Averting antenna degradation in the  
277  $\Delta nblA$  mutant possibly allows utilization of the cellular resources for the energy-intensive  
278 nitrogen fixation process instead. Retention of PBS in the vegetative cells of the mutant  
279 during acclimation to nitrogen limitation did not seem to have any significant adverse  
280 effect on growth or metabolism. A small inhibitory effect on growth was observed for a  
281 few hours after inoculation into nitrogen deplete medium which could be a result of a  
282 slight reduction in photosynthesis observed under these conditions, but the final  
283 biomass accumulation was similar to the WT. Interestingly, the higher nitrogenase  
284 activity in the mutant did not contribute to faster growth under high light, suggesting that  
285 other cellular resources could be limiting or that the high rates of N<sub>2</sub>-fixation achieved by  
286 the WT are optimal to support fast growth of this strain. The excess N<sub>2</sub> in the  $\Delta nblA$   
287 strain is probably channelized into storage reserves. When grown for an extended  
288 period of time (>30h) excess EPS secretion led to clumping of the filaments into a tight  
289 ball thereby limiting light availability to the cells resulting in greatly reduced nitrogenase  
290 activity indicating that access to high light is crucial for augmenting nitrogenase function.  
291 In contrast, when grown under low light, the presence of PBS turned out to be  
292 advantageous for efficient light harvesting in the mutant and this was reflected in faster  
293 growth compared to the WT(Fig. S4). However, the low light growth conditions could not  
294 elicit an increase in nitrogenase activity. This again suggests that the high rates of  
295 nitrogenase activity in the WT *Anabaena* 33047 is optimal to support growth under all  
296 conditions but light can be a limiting factor<sup>4</sup>. The mutant thus holds the potential to  
297 channelize the excess pool of nitrogen fixed under high light towards nitrogen-rich  
298 products of interest.

299 Our study demonstrates a link between PBS content and nitrogenase activity in  
300 heterocysts. Increased light absorption by PBS leads to enhanced cyclic  
301 phosphorylation which is the driving force for nitrogen fixation. Thus, in a high light  
302 tolerant strain like *Anabaena* 33047 modifying the heterocyst antenna by disabling  
303 degradation of PBS during nitrogen acclimation appears to be an effective strategy for  
304 enhancing nitrogen-fixation rates.

## 305 **Materials and Methods**

### 306 *Cyanobacterial strains and growth conditions*

307 The *Anabaena* sp. ATCC 33047 strain was procured from the UTEX Culture Collection  
308 of Algae at the University of Texas at Austin ([www.utex.org](http://www.utex.org)). The strain was isolated  
309 from the Texas Gulf coast more than five decades ago. It was then designated as  
310 *Anabaena* CA (36,37) For conjugation experiments, cells were grown in BG11 medium  
311 with added nitrate, in shake flasks (~150 rpm), under  $150\mu\text{mol photons m}^{-2}\text{s}^{-1}$  of white  
312 light in ambient air at 38°C. For physiological studies, cells were grown in ASP2 liquid  
313 medium with or without added nitrate at desired light intensities. The *Anabaena* sp.  
314 ATCC 7120 strain was also acquired from the UTEX Culture Collection and cells were  
315 grown in BG11 medium at  $50\mu\text{mol photons m}^{-2}\text{s}^{-1}$  of white light in ambient air at 28°C  
316 with or without added nitrate.

### 317 *Genetic modification and construction of strains*

318 The  $\Delta nbIA$  strain was generated by replacing the *nbIA* gene with a kanamycin  
319 resistance cassette using homologous recombination. The deletion construct was  
320 conjugated into *Anabaena* 33047 using a modified helper plasmid (pSL3348),  
321 containing five methylase or methyltransferase genes from the genome of *Anabaena*

322 33047 (Supplementary table 1). Details of vector construction and conjugation protocol  
323 are provided as supplementary information.

### 324 *Growth Analysis*

325 For growth measurements, *Anabaena* 33047 cultures were maintained in ASP2  
326 medium, with shaking at ~150rpm, under 250 $\mu$ mol photons m<sup>-2</sup>s<sup>-1</sup> of white light in  
327 ambient air at 38°C. *Anabaena* 7120 cultures were maintained in BG11 medium, with  
328 shaking at ~150rpm, under 50 $\mu$ mol photons m<sup>-2</sup>s<sup>-1</sup> of white light in ambient air at 28°C.  
329 Culture aliquots were then diluted to an OD730 of 0.05 in a Multi-Cultivator MC 1000-  
330 OD device (Photon Systems Instruments, Drasov, Czech Republic), and growth under  
331 continuous light-emitting diode (LED) light of different intensities in ambient air  
332 supplemented with 1% CO<sub>2</sub> were measured at 730nm.

### 333 *Fluorescence Microscopy*

334 Cells from 24-48h liquid culture were imaged using a Nikon Eclipse 80i microscope  
335 equipped with a Photometrics Cool Snap ES CCD camera (Roper Scientific).  
336 Illumination was provided by a metal halide light source (X-Cite). PBS fluorescence was  
337 detected using a 560/40nm excitation filter, a 595nm dichroic beam splitter, and a  
338 630/60nm emission filter.

### 339 *Measuring PBS in heterocysts.*

340 Steady state fluorescence kinetics of WT and  $\Delta nbIA$  heterocysts of *Anabaena* 33047  
341 were measured by the Fluorescence Kinetic Microscope (Photon Systems Instruments,  
342 Drasov, Czech Republic, [www.psi.cz](http://www.psi.cz)). PBS were excited with green LED light (LZ1-  
343 00G100, 530 nm peak). A steady state PBS fluorescence was separated from exciting  
344 light by a dichroic mirror with 562nm edge wavelength (Semrock 562nm edge  
345 BrightLine<sup>®</sup>) and collected using an emission filter with transmission band 663.5 – 666.5

346 nm (Semrock 660/13nm BrightLine<sup>®</sup>). Signal were measured from individual heterocysts  
347 and vegetative cells using the 40x objective (Zeiss Plan-Apochromat 40x/1.4 Oil). The  
348 average signal from a minimum of 10 cells was used to obtain the representative PBS  
349 signal from the mutant and the WT. The FluorCam7 software developed by Photon  
350 Systems Instruments was used to operate the FKM and analyze the data.

351

### 352 *Nitrogen fixation assay*

353 Nitrogenase activity was measured using the acetylene reduction assay, as described in  
354 reference (38) and expressed in terms of the ethylene produced per mg of chlorophyll.

355 Cultures were grown in ASP2 medium lacking fixed nitrogen in multicultivator tubes  
356 under 250 and 2000  $\mu\text{mol photons m}^{-2}\text{s}^{-1}$ , at 42°C in air supplemented with 3% CO<sub>2</sub>.

357 Cells were transferred to airtight 100ml glass vials and incubated in a 5% acetylene  
358 atmosphere under light at 450 $\mu\text{mol photons m}^{-2}\text{s}^{-1}$  38°C for 3h. Gas samples were

359 withdrawn from the vials, and ethylene production was measured using an Agilent

360 6890N gas chromatograph equipped with a Poropak N column and a flame ionization

361 detector, with argon as the carrier gas (38).

### 362 *PSI measurements*

363 P700 concentration in whole cells was determined using a JTS-10 pump probe

364 spectrometer (BioLogic, France). Cultures grown to mid-exponential phase were

365 normalized to 5  $\mu\text{g/mL}$  chlorophyll and incubated at 38°C under light prior to

366 measurements. For analysis of P700 kinetics, samples were treated with the required

367 inhibitors (10 $\mu\text{M}$  DCMU, 20 $\mu\text{M}$  DBMIB) and dark adapted for 3 min before subjecting

368 them to an actinic light pulse. The redox state of P700 was monitored by absorption at

369 705 nm during the 5 min saturating pulse and for 10 seconds of recovery afterwards.



370

371 ACKNOWLEDGEMENTS: This study was supported by funding from the U.S.  
372 Department of Energy, Office of Science, Office of Biological and Environmental  
373 Research, Genomic Science Program under Award Number DE-SC0019386 and  
374 Gordon and Betty Moore Foundation (GBMF5760) to HBP. ZY's visit to Washington  
375 University was also supported by the National Natural Science Foundation of China  
376 (31400215).

377

## 378 References

- 379 1. Kumar K, Mella-Herrera RA, Golden JW. 2010. Cyanobacterial heterocysts. Cold Spring  
380 Harb Perspect Biol 2:a000315.
- 381 2. Haselkorn R. 1978. Heterocysts. Annu Rev Plant Physiol 29:319-344.
- 382 3. Magnuson A. 2019. Heterocyst thylakoid bioenergetics. Life (Basel) 9.
- 383 4. Zheng L, Li Y, Li X, Zhong Q, Li N, Zhang K, Zhang Y, Chu H, Ma C, Li G, Zhao J,  
384 Gao N. 2019. Structural and functional insights into the tetrameric photosystem I from  
385 heterocyst-forming cyanobacteria. Nat Plants 5:1087-1097.
- 386 5. Ow SY, Noirel J, Cardona T, Taton A, Lindblad P, Stensjo K, Wright PC. 2009.  
387 Quantitative overview of N<sub>2</sub> fixation in *Nostoc punctiforme* ATCC 29133 through  
388 cellular enrichments and iTRAQ shotgun proteomics. J Proteome Res 8:187-98.
- 389 6. Ow SY, Cardona T, Taton A, Magnuson A, Lindblad P, Stensjo K, Wright PC. 2008.  
390 Quantitative shotgun proteomics of enriched heterocysts from *Nostoc* sp. PCC 7120 using  
391 8-plex isobaric peptide tags. J Proteome Res 7:1615-28.
- 392 7. Cardona T, Magnuson A. 2010. Excitation energy transfer to Photosystem I in filaments  
393 and heterocysts of *Nostoc punctiforme*. Biochim Biophys Acta 1797:425-33.
- 394 8. Alberte RS, Tel-Or E, Packer L, Thornber JP. 1980. Functional organisation of the photo-  
395 synthetic apparatus in heterocysts of nitrogen-fixing cyanobacteria. Nature 284:481-483.
- 396 9. Bogorad L. 1975. Phycobiliproteins and complementary chromatic adaptation. Annu Rev  
397 of Plant Physiol 26:369-401.
- 398 10. Richaud C, Zabulon G, Joder A, Thomas J-C. 2001. Nitrogen or sulfur starvation  
399 differentially affects phycobilisome degradation and expression of the *nblA* gene in  
400 *Synechocystis* strain PCC 6803. J Bacteriol 183:2989-2994.
- 401 11. Grossman A.R. SR, Bhaya D., Dolganov N. . 1998. Phycobilisome degradation and  
402 responses of cyanobacteria to nutrient limitation and high light. In G. G (ed),  
403 Photosynthesis: mechanisms and effects doi:[https://doi.org/10.1007/978-94-011-3953-3\\_669](https://doi.org/10.1007/978-94-011-3953-3_669). Springer, Dordrecht.
- 404

- 405 12. Collier JL, Grossman AR. 1994. A small polypeptide triggers complete degradation of  
406 light-harvesting phycobiliproteins in nutrient-deprived cyanobacteria. *EMBO J* 13:1039-  
407 1047.
- 408 13. Grossman AR, Schaefer MR, Chiang GG, Collier JL. 1993. The phycobilisome, a light-  
409 harvesting complex responsive to environmental conditions. *Microbiol Rev* 57:725-49.
- 410 14. Grossman AR, Bhaya D, He Q. 2001. Tracking the light environment by cyanobacteria  
411 and the dynamic nature of light harvesting. *J Biol Chem* 276:11449-52.
- 412 15. Schwarz R, Forchhammer K. 2005. Acclimation of unicellular cyanobacteria to  
413 macronutrient deficiency: emergence of a complex network of cellular responses.  
414 *Microbiol (Reading)* 151:2503-2514.
- 415 16. Moreno J, Vargas MÁ, Rodri, x, guez H, Rivas J, x, Guerrero MG. 2003. Outdoor  
416 cultivation of a nitrogen-fixing marine cyanobacterium, *Anabaena* sp. ATCC 33047.  
417 *Biomol Eng* 20:191-197.
- 418 17. Kumar A, Tabita FR, Van Baalen C. 1982. Isolation and characterization of heterocysts  
419 from *Anabaena* sp. strain CA. *Arch Microbiol* 133:103-109.
- 420 18. Misra HS, Mahajan SK. 2000. Excitation energy transfer from phycobilisomes to  
421 photosystems: a phenomenon associated with the temporal separation of photosynthesis  
422 and nitrogen fixation in a cyanobacterium, *Plectonema boryanum*. *Biochim Biophys Acta*  
423 1459:139-47.
- 424 19. Watanabe M, Semchonok DA, Webber-Birungi MT, Ehira S, Kondo K, Narikawa R,  
425 Ohmori M, Boekema EJ, Ikeuchi M. 2014. Attachment of phycobilisomes in an antenna-  
426 photosystem I supercomplex of cyanobacteria. *Proc Natl Acad Sci USA* 111:2512-2517.
- 427 20. Elhai J, Vepritskiy A, Muro-Pastor AM, Flores E, Wolk CP. 1997. Reduction of conjugal  
428 transfer efficiency by three restriction activities of *Anabaena* sp. strain PCC 7120. *J*  
429 *Bacteriol* 179:1998-2005.
- 430 21. Elhai J, Wolk CP. 1988. Conjugal transfer of DNA to cyanobacteria. *Methods Enzymol*  
431 167:747-54.
- 432 22. Trebst A. 2007. Inhibitors in the functional dissection of the photosynthetic electron  
433 transport system. *Photosynth Res* 92:217-24.
- 434 23. Joliot P, Joliot A. 2005. Quantification of cyclic and linear flows in plants. *Proc Natl*  
435 *Acad Sci USA* 102:4913-4918.
- 436 24. Berla BM, Saha R, Maranas CD, Pakrasi HB. 2015. Cyanobacterial alkanes modulate  
437 photosynthetic cyclic electron flow to assist growth under cold stress. *Sci Rep* 5:14894.
- 438 25. Marathe A, Kallas T. 2012. Cyclic electron transfer pathways in *Synechococcus* sp. PCC  
439 7002 cyanobacteria during photosynthesis at high light intensity Master of Science -  
440 Biology thesis, The University of Wisconsin Oshkosh.
- 441 26. Dines M, Sendersky E, David L, Schwarz R, Adir N. 2008. Structural, functional, and  
442 mutational analysis of the NblA protein provides insight into possible modes of  
443 interaction with the phycobilisome. *J Biol chem* 283:30330-30340.
- 444 27. Ungerer J, Pakrasi HB. 2016. Cpf1 is a versatile tool for CRISPR genome editing across  
445 diverse species of cyanobacteria. *Sci Rep* 6:39681.
- 446 28. Yu J, Liberton M, Cliften PF, Head RD, Jacobs JM, Smith RD, Koppenaar DW, Brand  
447 JJ, Pakrasi HB. 2015. *Synechococcus elongatus* UTEX 2973, a fast growing  
448 cyanobacterial chassis for biosynthesis using light and CO<sub>2</sub>. *Sci Rep* 5:8132.

- 449 29. Baier K, Lehmann H, Stephan DP, Lockau W. 2004. NblA is essential for phycobilisome  
450 degradation in *Anabaena* sp. strain PCC 7120 but not for development of functional  
451 heterocysts. *Microbiol* 150:2739-2749.
- 452 30. Peterson RB, Dolan E, Calvert HE, Ke B. 1981. Energy transfer from phycobiliproteins  
453 to photosystem I in vegetative cells and heterocysts of *Anabaena variabilis*. *Biochim*  
454 *Biophys Acta* 634:237-48.
- 455 31. Almon H, Böhme H. 1982. Photophosphorylation in isolated heterocysts from the blue-  
456 green alga *Nostoc muscorum*. *Biochim Biophys Acta (BBA) - Bioenergetics* 679:279-  
457 286.
- 458 32. Janaki S, Wolk CP. 1982. Synthesis of nitrogenase by isolated heterocysts. *Biochim*  
459 *Biophys Acta (BBA) - Gene Structure and Expression* 696:187-192.
- 460 33. Tel-Or E, Stewart WD. 1976. Photosynthetic electron transport, ATP synthesis and  
461 nitrogenase activity in isolated heterocysts of *Anabaena cylindrica*. *Biochim Biophys*  
462 *Acta* 423:189-95.
- 463 34. Miyake C, Horiguchi S, Makino A, Shinzaki Y, Yamamoto H, Tomizawa K-i. 2005.  
464 Effects of light intensity on cyclic electron flow around PSI and its relationship to non-  
465 photochemical quenching of Chl fluorescence in tobacco leaves. *Plant Cell Physiol*  
466 46:1819-1830.
- 467 35. Huang W, Yang Y-J, Hu H, Zhang S-B. 2015. Different roles of cyclic electron flow  
468 around photosystem I under sub-saturating and saturating light intensities in tobacco  
469 leaves. *Front Plant Sci* 6.
- 470 36. Stacey G, Van Baalen C, Tabita FR. 1977. Isolation and characterization of a marine  
471 *Anabaena* sp. capable of rapid growth on molecular nitrogen. *Arch Microbiol* 114:197-  
472 201.
- 473 37. Pfeffer S, Brown RM. 2016. Complete genome sequence of the cyanobacterium  
474 *Anabaena* sp. 33047. *Genome Announc* 4:e00809-16.
- 475 38. Bandyopadhyay A, Stockel J, Min H, Sherman LA, Pakrasi HB. 2010. High rates of  
476 photobiological H<sub>2</sub> production by a cyanobacterium under aerobic conditions. *Nat*  
477 *Commun* 1:139.
- 478
- 479

480 **Figure Legends**

481 Fig 1

*Anabaena* 33047 thrives under high light. Representative growth curves of WT cells under different light intensities (Blue-500, Green-1000, Yellow-1500, Red-2000  $\mu\text{mol m}^{-2} \text{s}^{-1}$ ). Cells were grown at 42°C in medium with (A) or without (B) added nitrogen sources. Cultures were supplemented with 1% CO<sub>2</sub>.

482 Fig 2

483 Microscopic analysis showing high amounts of PBS in heterocysts of the  $\Delta nbIA$  mutant  
484 of *Anabaena* 33047. (A-D) Brightfield and fluorescence microscopic images of WT (A,B)  
485 and  $\Delta nbIA$  (C,D) mutant of *Anabaena* 33047 grown in media lacking fixed nitrogen  
486 sources. High amount of PBS retained in the  $\Delta nbIA$  heterocysts compared to the WT  
487 (arrows). (E-G) FKM analysis of WT and  $\Delta nbIA$  heterocysts. (E,F) Bright signal seen in  
488 heterocysts of the  $\Delta nbIA$  mutant compared to the WT (arrows). (G) Average of steady  
489 state fluorescence obtained from WT and  $\Delta nbIA$  mutant after excitation of  
490 phycobilisomes in heterocysts.

491 Fig 3

492 Nitrogenase activity in the WT and  $\Delta nbIA$  strains of *Anabaena* 33047 grown in nitrogen  
493 deplete medium under low (250  $\mu\text{mol photons m}^{-2}\text{s}^{-1}$ ) or high (2000  $\mu\text{mol photons m}^{-2}\text{s}^{-1}$ )  
494 light intensities. Representative data are shown as the average of three biological  
495 replicates, and error bars show the standard deviation from the average.

496 Fig 4

497 P700 redox kinetics for WT and  $\Delta nbIA$  mutant of *Anabaena* 33047 grown under high  
498 light (2000  $\mu\text{mol photons m}^{-2}\text{s}^{-1}$ ). Dark adapted cells were exposed to a pulse of actinic

499 light for 5 seconds (white bar above panel A). This was followed by dark incubation  
500 (black bar above panel A). During this time-course, measuring flashes of 705 nm light  
501 probed the redox state of the P700 reaction center of PSI. (A) P700 redox kinetics in  
502 DCMU treated (10  $\mu$ M) WT and  $\Delta nbIA$  cells. (B) P700 redox kinetics in WT and  $\Delta nbIA$   
503 cells treated with DCMU (10  $\mu$ M) and DBMIB (1  $\mu$ M). (C) Details of the re-reduction  
504 kinetics of P700<sup>+</sup> in the dark (normalized to total oxidizable P<sub>700</sub>) for the experiment in  
505 panel A. Each trace is an average of 3 independent experiments. (D) The halftimes  
506 (milliseconds) for re-reduction of P700<sup>+</sup> in the dark.

507  
508 Fig 5

509 Schematics depicting the differences in the heterocysts of the WT and  $\Delta nbIA$  strains  
510 that contribute to enhanced nitrogenase activity. Higher abundance of phycobilisomes in  
511 the mutant heterocyst and their association with PSI centers leads to higher ATP  
512 generation mediated by cyclic electron flow. The ATP feeds into the nitrogenase  
513 enzyme complex leading to higher rates of nitrogen fixation in the  $\Delta nbIA$  mutant.

## Supplementary information - legends

514

### 515 **Figures**

516 Figure S1 Characterization of *Anabaena* 33047. (A) Comparison of bright field and  
517 fluorescence images of filaments of *Anabaena* 33047 and *Anabaena* 7120 grown under  
518 nitrogen fixing conditions. Higher frequency of heterocysts is observed in *Anabaena*  
519 33047 (arrows). (B) Comparison of nitrogenase activity in *Anabaena* 33047 and  
520 *Anabaena* 7120. Representative data are shown as the averages of three biological  
521 replicates, and error bars show the SDs from the averages.

522 Figure S2 Representative growth curves showing comparison of WT *Anabaena* 7120  
523 grown under  $400 \mu\text{mol m}^{-2} \text{s}^{-1}$  light intensities at  $28^\circ\text{C}$  in medium with (blue) and without  
524 (green) sources of fixed nitrogen and supplemented with 1%  $\text{CO}_2$ .

525 Figure S3 Engineering genetic amenability in *Anabaena* 33047. (A) Schematics of the  
526 strategy used for designing the helper plasmid that was used in tri-parental conjugation  
527 of *Anabaena* 33047. (B) Segregation analysis of the  $\Delta nblA$  mutant. (C) PCR analysis  
528 verifying segregation of the  $\Delta nblA$  mutant.

529 Figure S4 Representative curves showing growth comparison of WT (solid lines) and  
530  $\Delta nblA$  (dotted lines) strains of *Anabaena* 33047 under low and high light intensities at  
531  $42^\circ\text{C}$  in medium without sources of fixed nitrogen and supplemented with 1%  $\text{CO}_2$ . Red  
532 -  $2000 \mu\text{mol m}^{-2} \text{s}^{-1}$ , green -  $500 \mu\text{mol m}^{-2} \text{s}^{-1}$ , grey -  $250 \mu\text{mol m}^{-2} \text{s}^{-1}$ .

533 Figure S5 Nitrogenase activity in the WT and  $\Delta nblA$  strains of *Anabaena* 33047 grown  
534 in nitrogen deplete medium and assayed in the presence of the inhibitors DCMU (10  
535  $\mu\text{M}$ ) and DBMIB (1  $\mu\text{M}$ ). Representative data are shown as the average of three  
536 biological replicates, and error bars show the standard deviation from the average.

537 Figure S6 P700 redox kinetics for WT and  $\Delta nblA$  mutant of *Anabaena* 33047 grown  
538 under high light (2000  $\mu\text{mol photons m}^{-2}\text{s}^{-1}$ ). (A) P700 kinetics in the WT and  $\Delta nblA$   
539 mutant in the absence of any inhibitor. (B) The details of the re-reduction kinetics of  
540  $\text{P700}^+$  in the dark (normalized to total oxidizable  $\text{P}_{700}$ ) for the experiments in figure 4B.  
541 (C) P700 kinetics in the WT and  $\Delta nblA$  mutant grown under nitrogen sufficient  
542 conditions and assayed in the presence of DCMU (10 $\mu\text{M}$ ). Each trace is an average of 3  
543 independent experiments.

544

545 **Table:**

546 **Table S1** Details of the Methylase or methyl transferase genes and their upstream  
547 regions that were cloned into the newly constructed helper plasmid pSL3348 that was  
548 used to successfully conjugate *Anabaena* 33047 and generate the  $\Delta nblA$  mutant.

549 **Text:**

550 **Materials and Methods** Genetic modification and construction of mutant

551

Figure 1

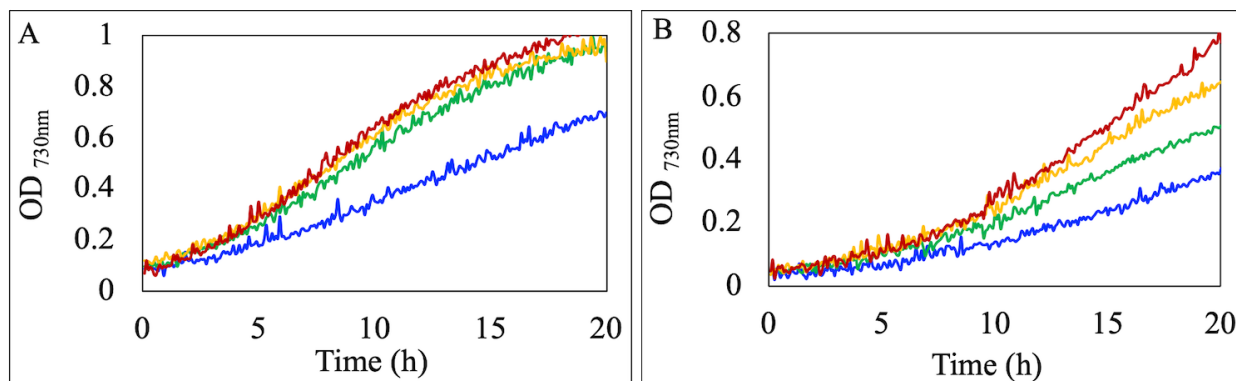



Figure 2

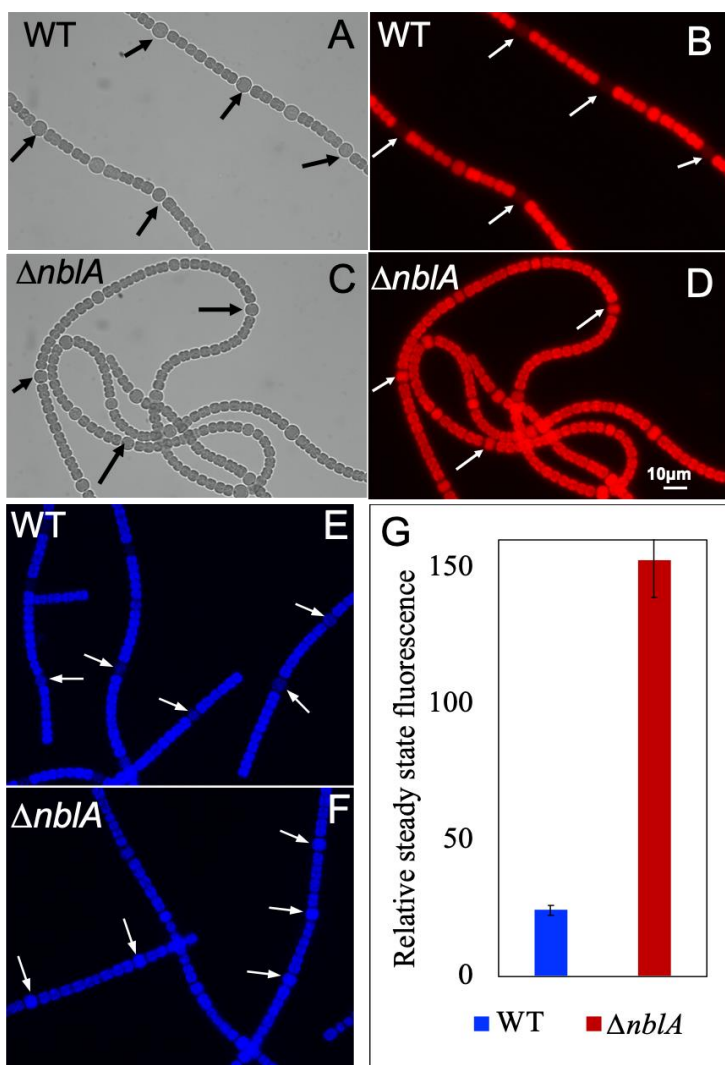

Figure 3

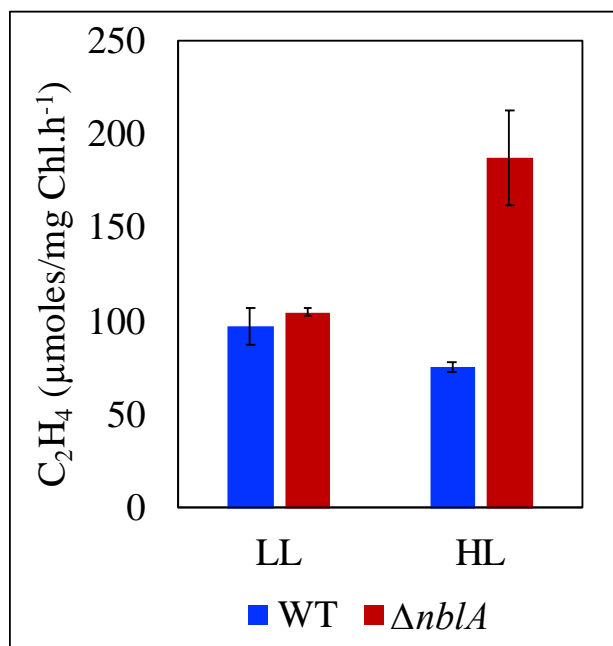

Figure 4

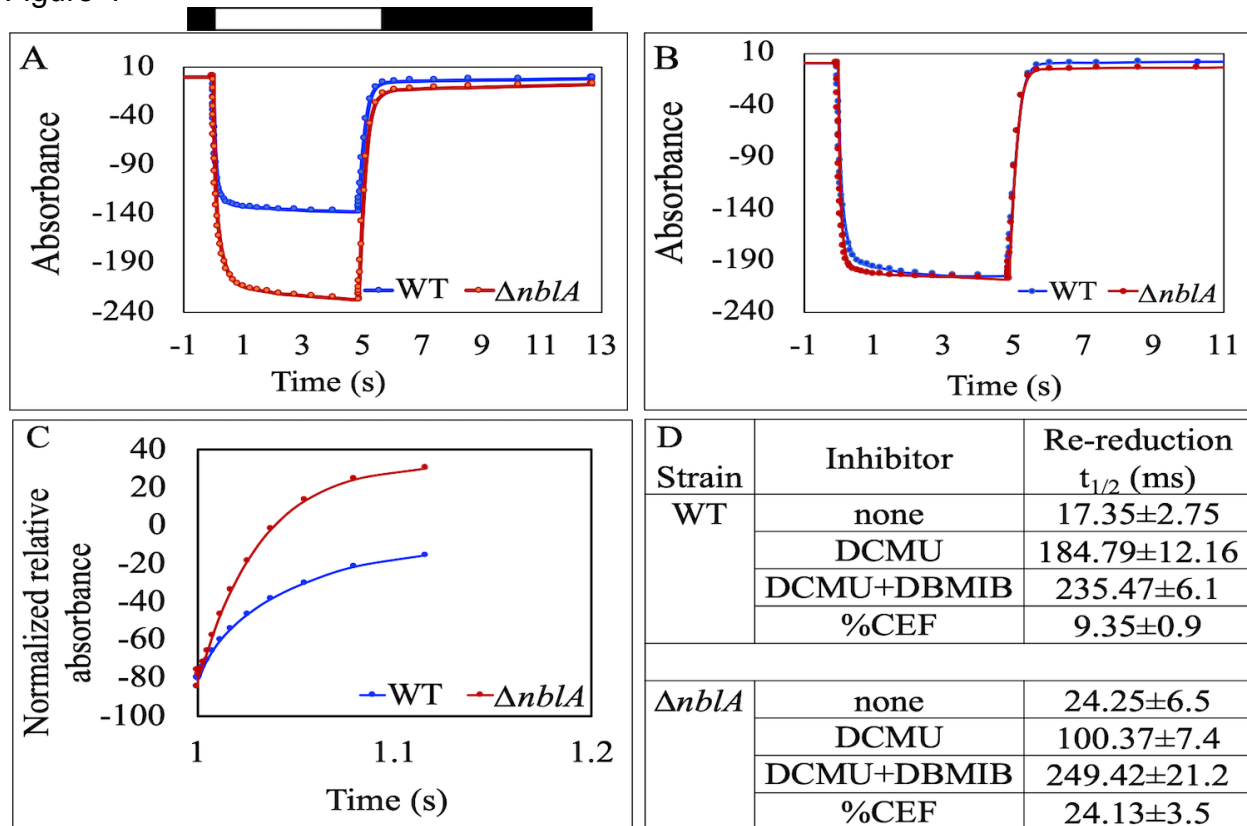

Figure 5

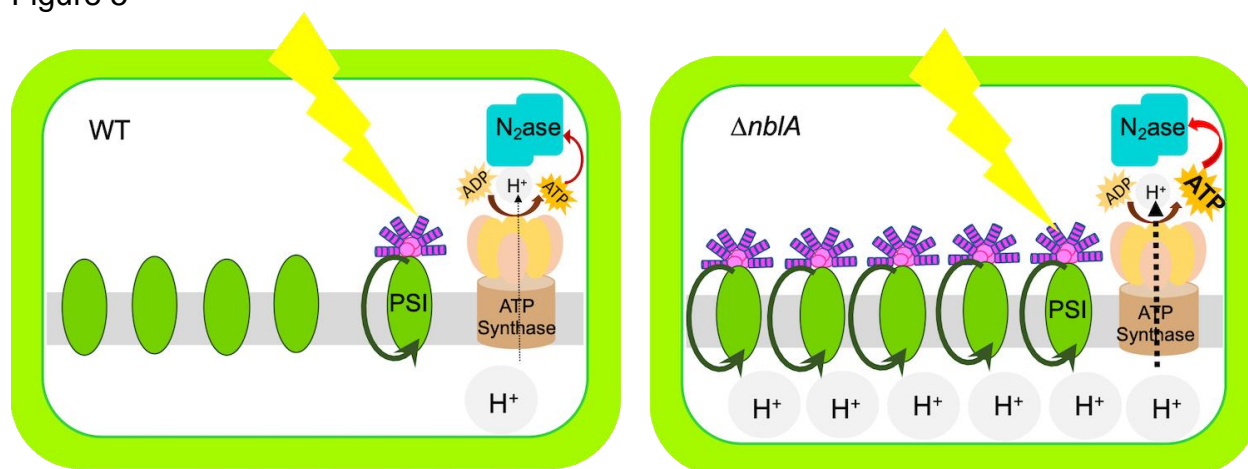

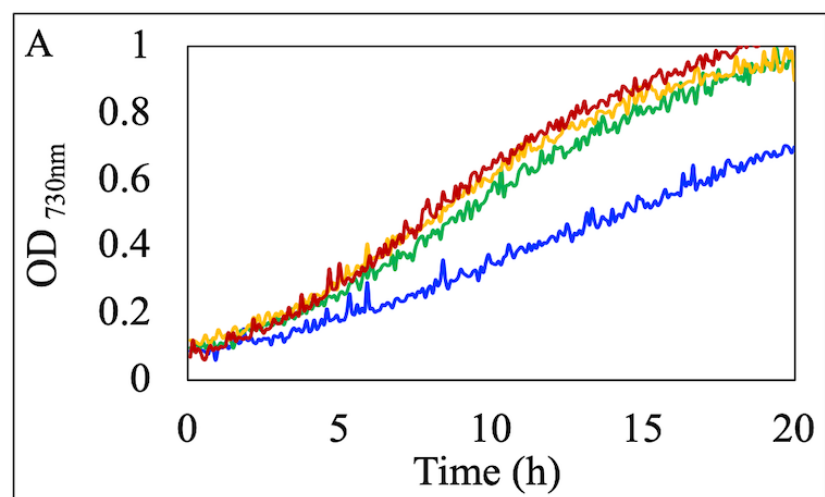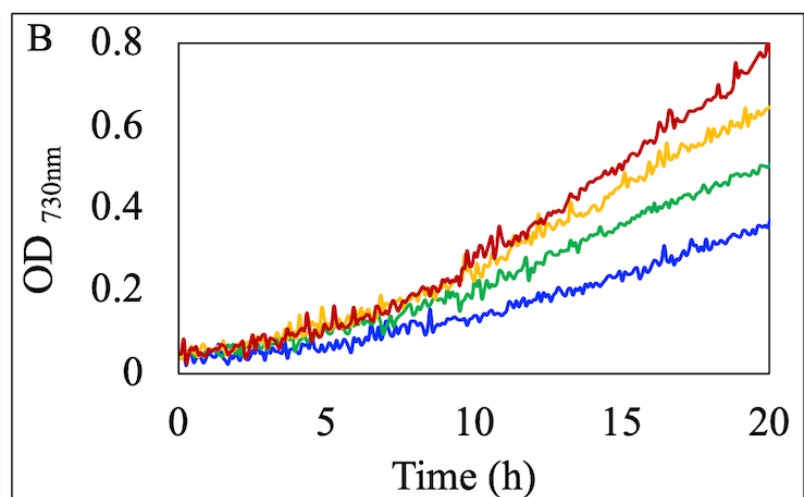

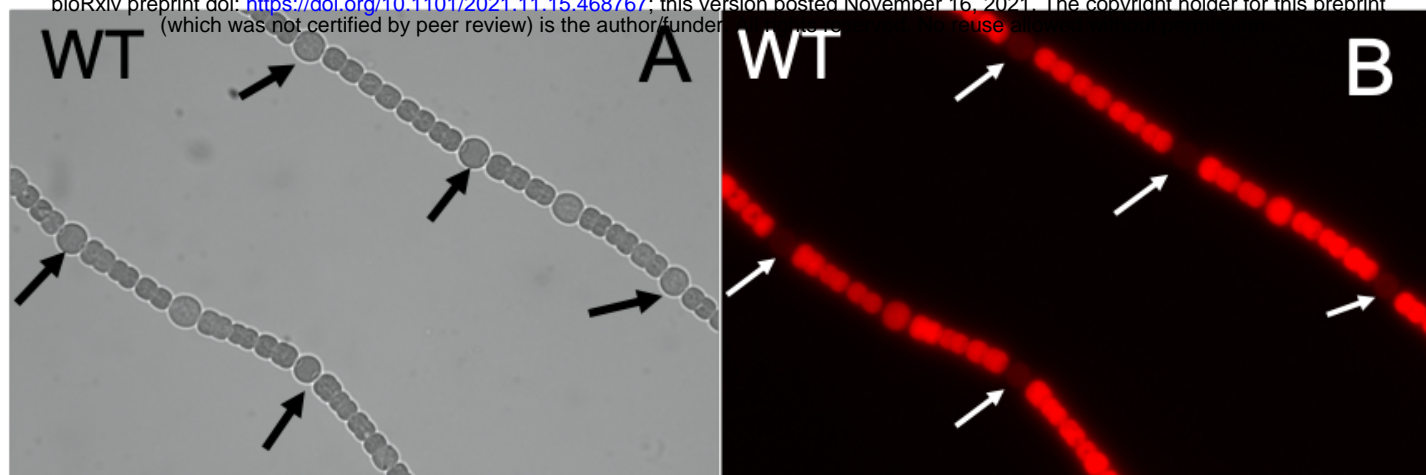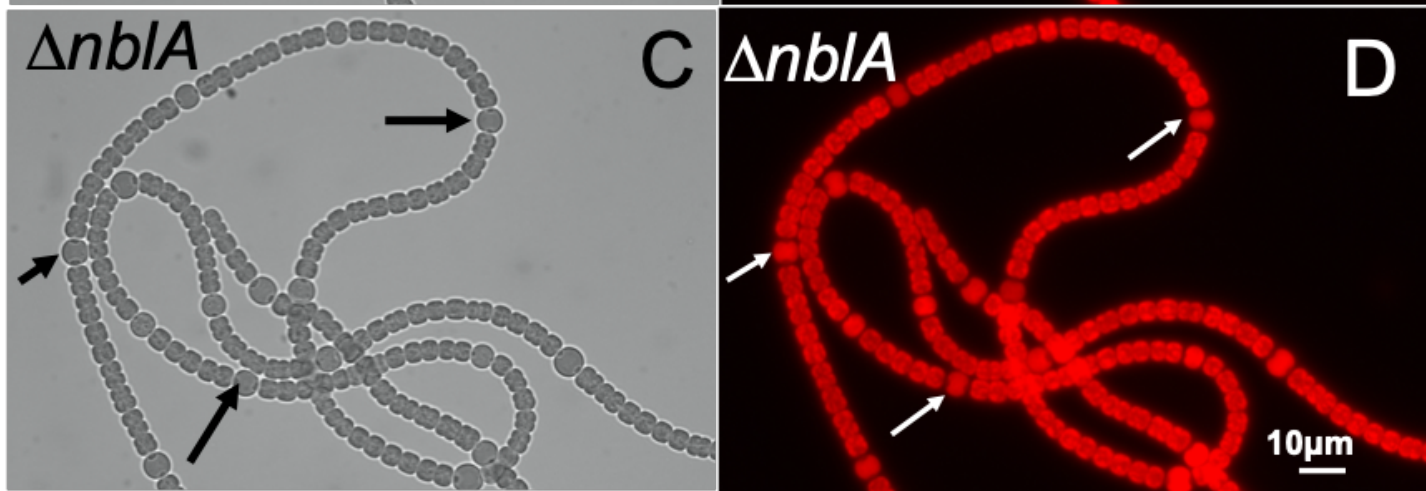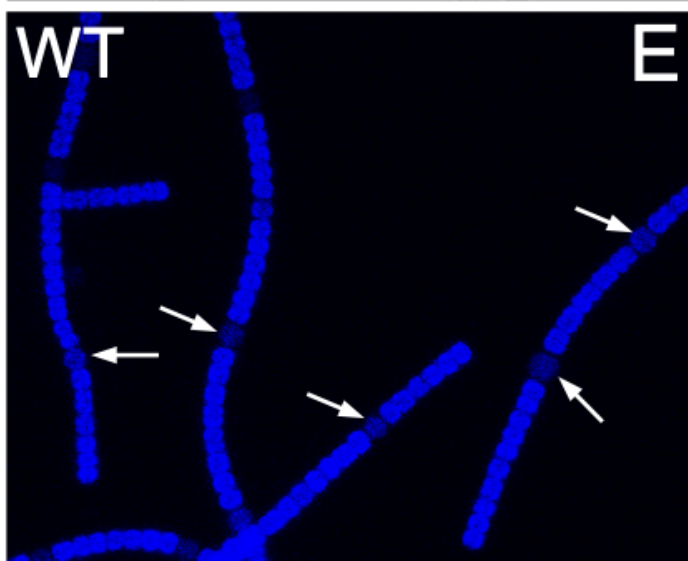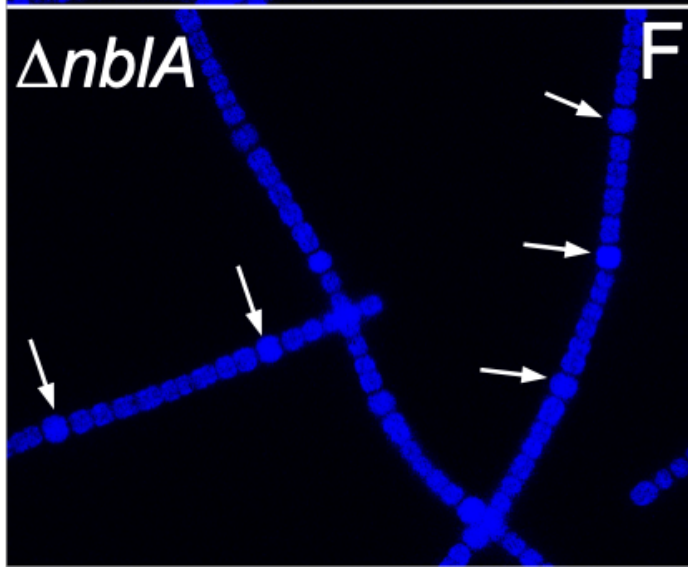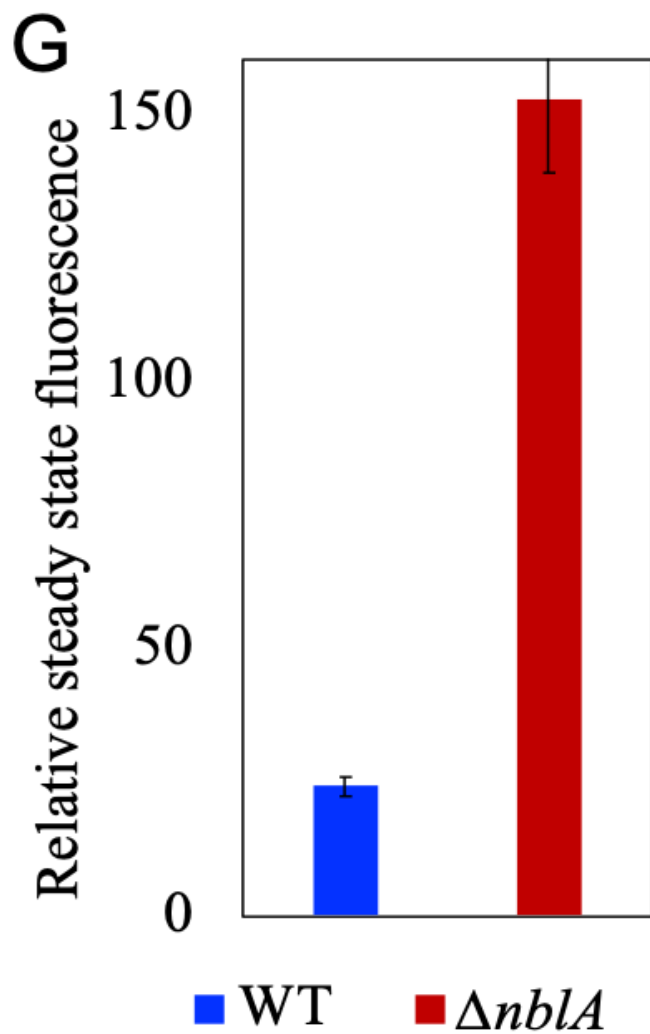

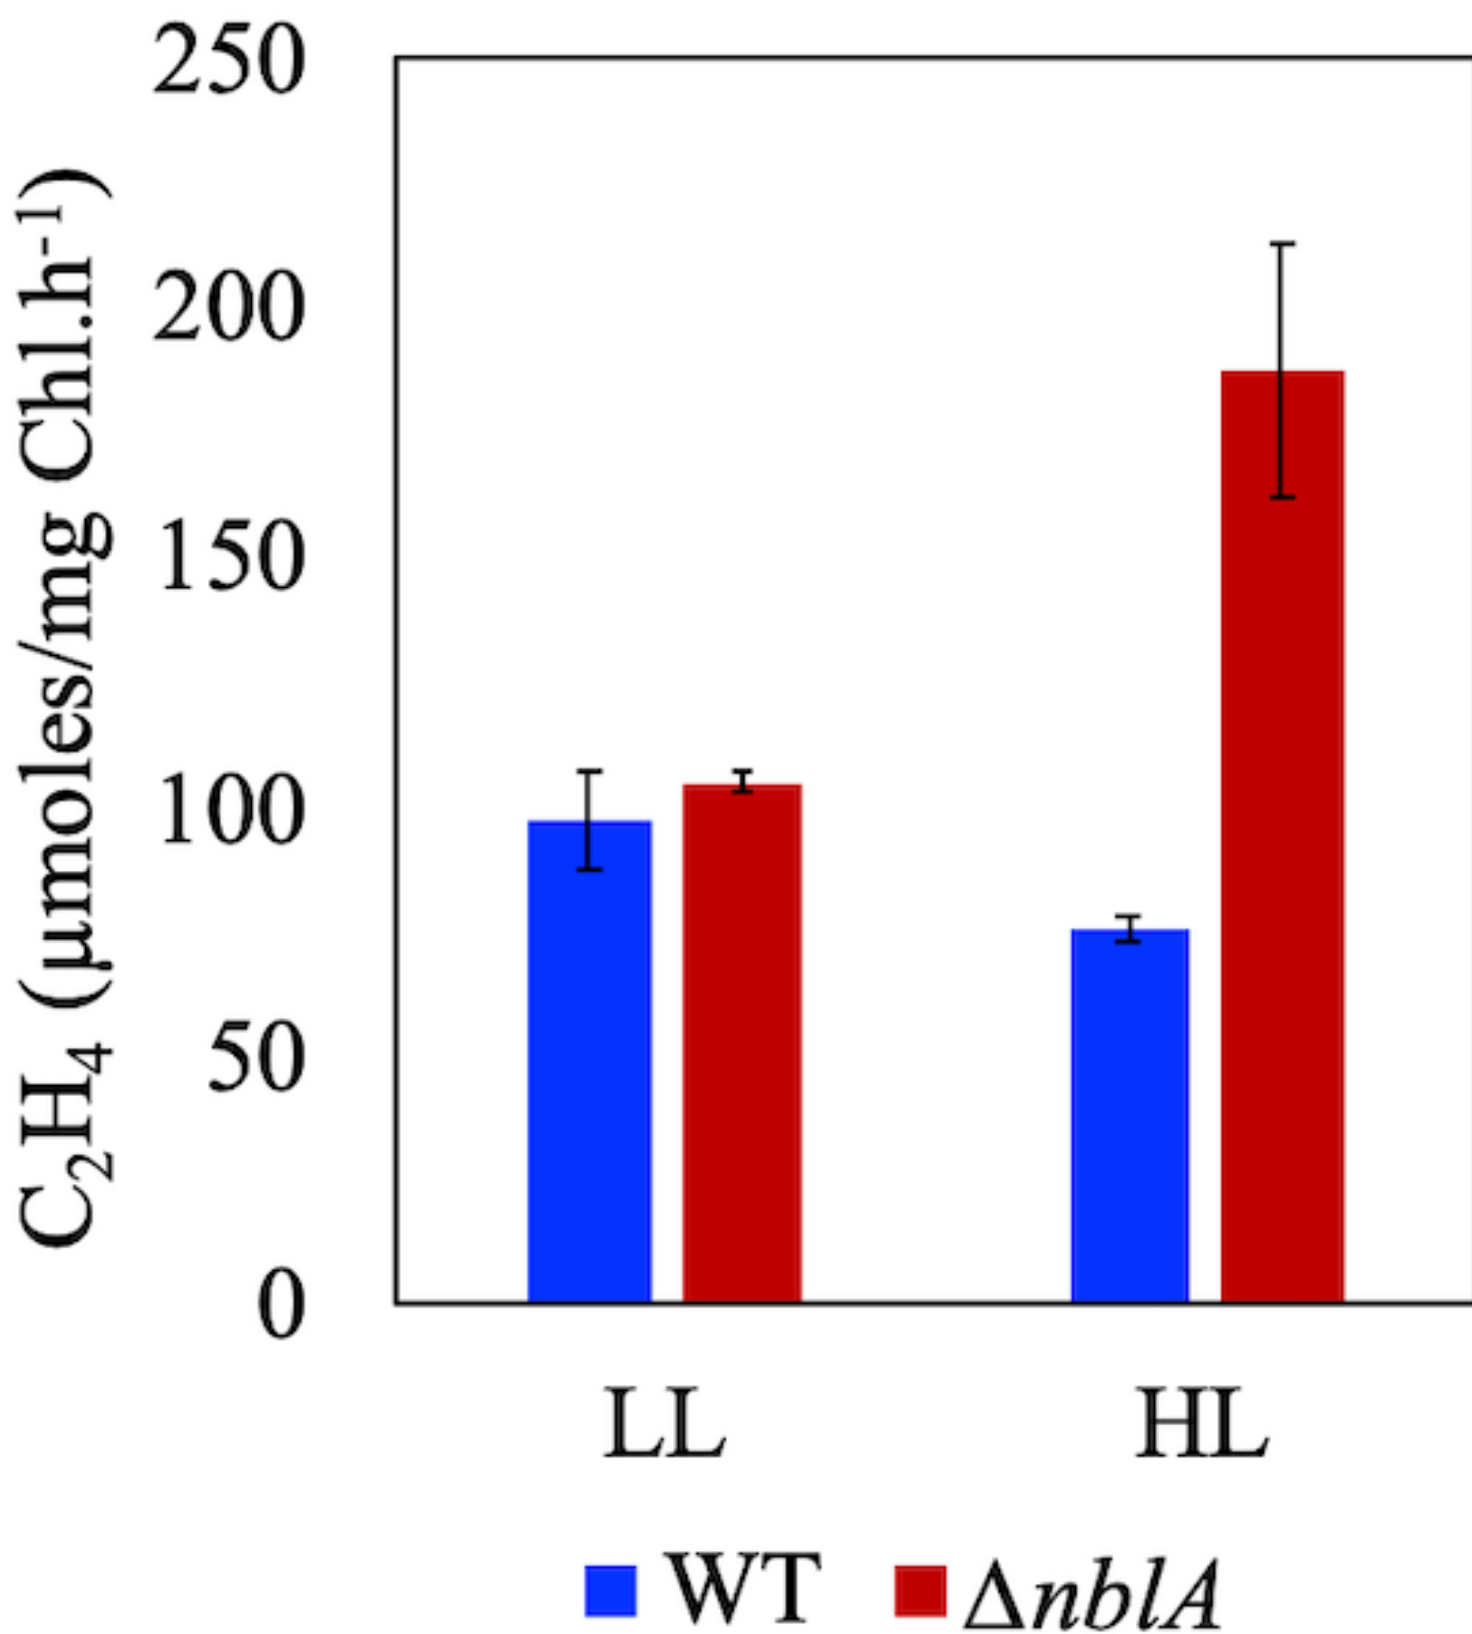

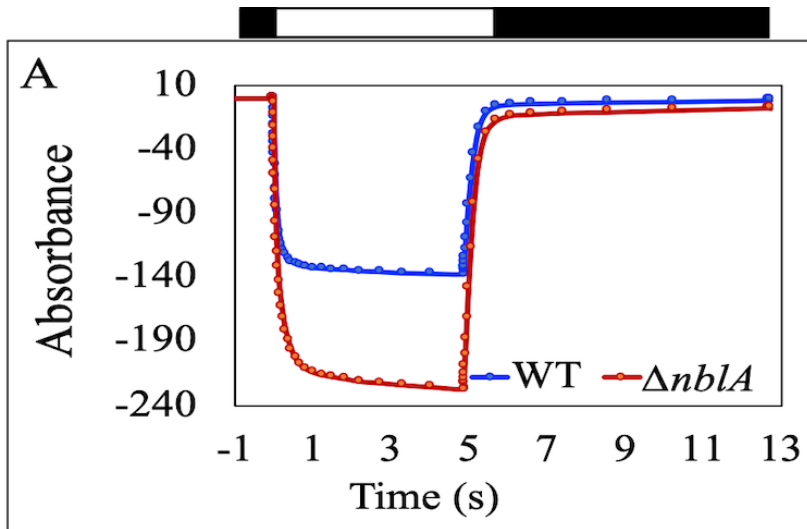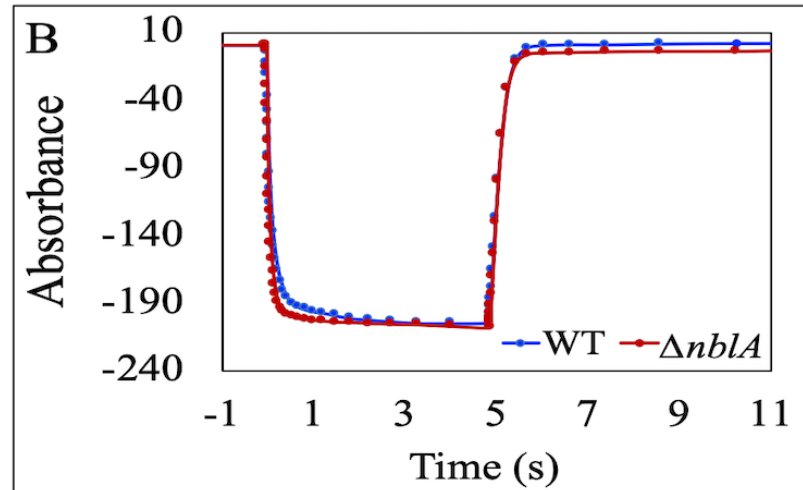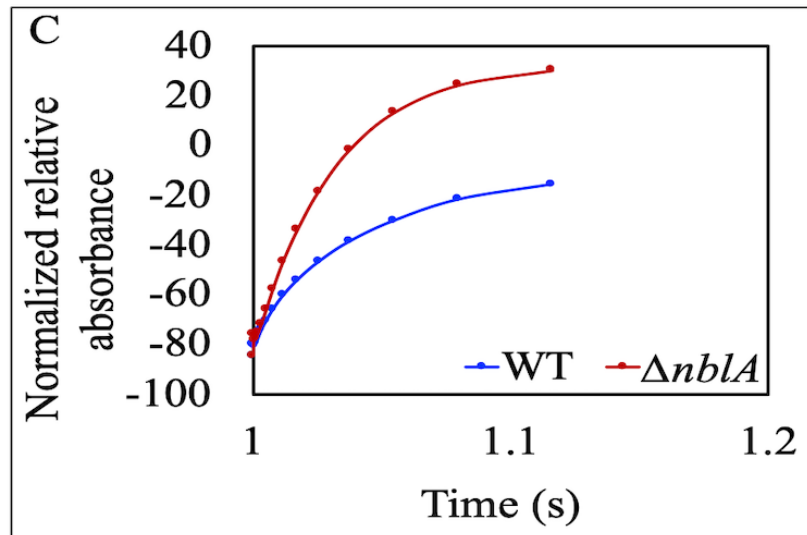

| D Strain      | Inhibitor  | Re-reduction $t_{1/2}$ (ms) |
|---------------|------------|-----------------------------|
| WT            | none       | 17.35±2.75                  |
|               | DCMU       | 184.79±12.16                |
|               | DCMU+DBMIB | 235.47±6.1                  |
|               | %CEF       | 9.35±0.9                    |
| $\Delta nblA$ | none       | 24.25±6.5                   |
|               | DCMU       | 100.37±7.4                  |
|               | DCMU+DBMIB | 249.42±21.2                 |
|               | %CEF       | 24.13±3.5                   |



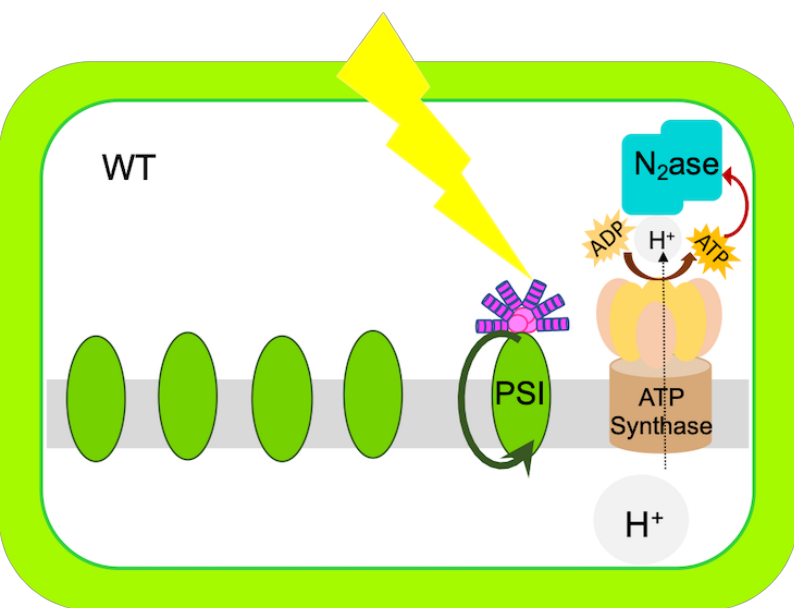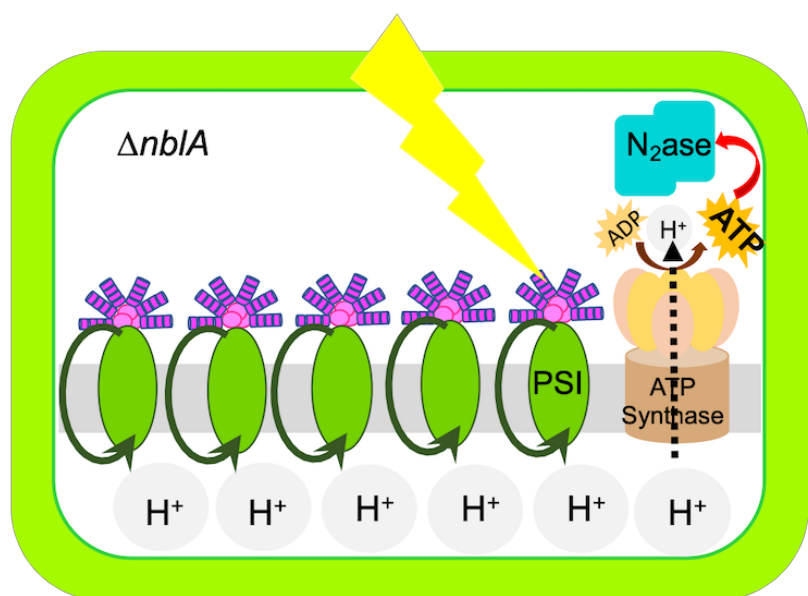

Source: https://www.biorxiv.org/content/10.1101/2021.11.15.468767v1.full.pdf
